# Supplementary material for: The chain-mail Co@C electrocatalyst accelerating one-step solid-phase redox for advanced Li–Se batteries
Source: Royal Society of Chemistry journal article supplement (doi:10.1039/d1ta10193e), 2022-01-01
Supplement: d1ta10193e3.pdf [file d1ta10193e3.pdf]

## Supporting Information

### **Chain-Mail Co@C Electrocatalyst Accelerating One-step Solid-phase Redox for Advanced Li–Se Batteries**

Wen-Da Dong,<sup>a, 1</sup> Chao-Fan Li,<sup>a, b, 1</sup> Hong-Yan Li,<sup>c</sup> Liang Wu,<sup>a</sup> Hemdan S. H. Mohamed,<sup>d</sup> Zhi-

Yi Hu,<sup>a, b\*</sup> Li-Hua Chen,<sup>a</sup> Yu Li,<sup>a\*</sup> and Bao-Lian Su,<sup>a, c\*</sup>

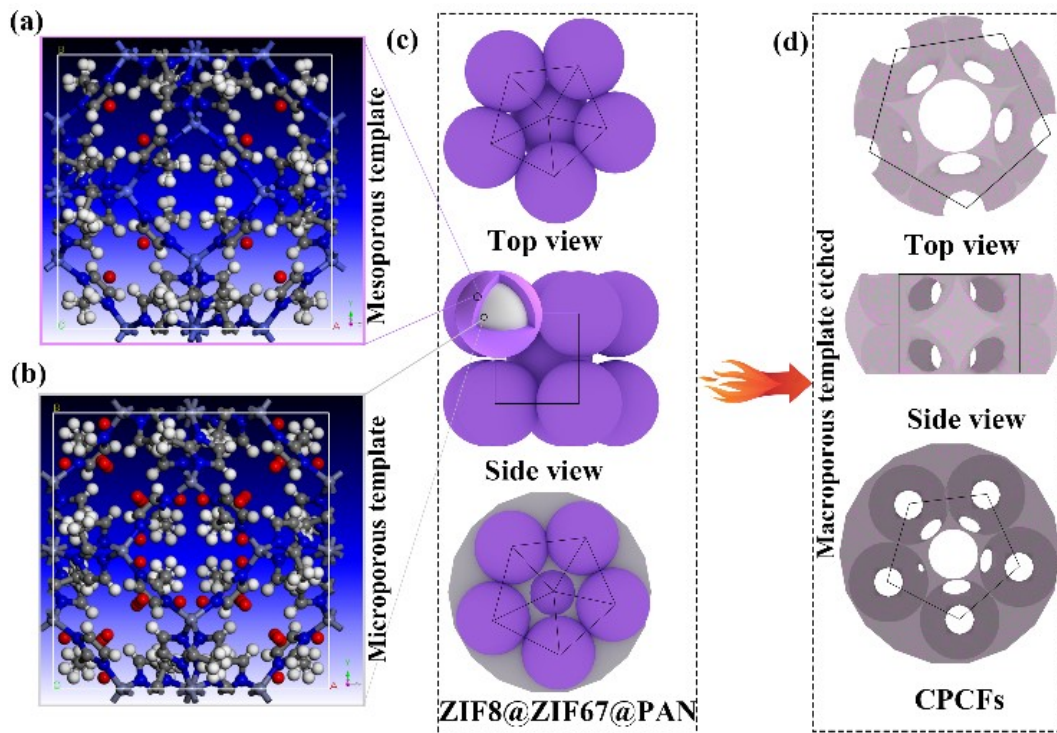

Fig. S1. Schematic design of Co nanoparticles embedded hierarchically porous carbon fibers host.

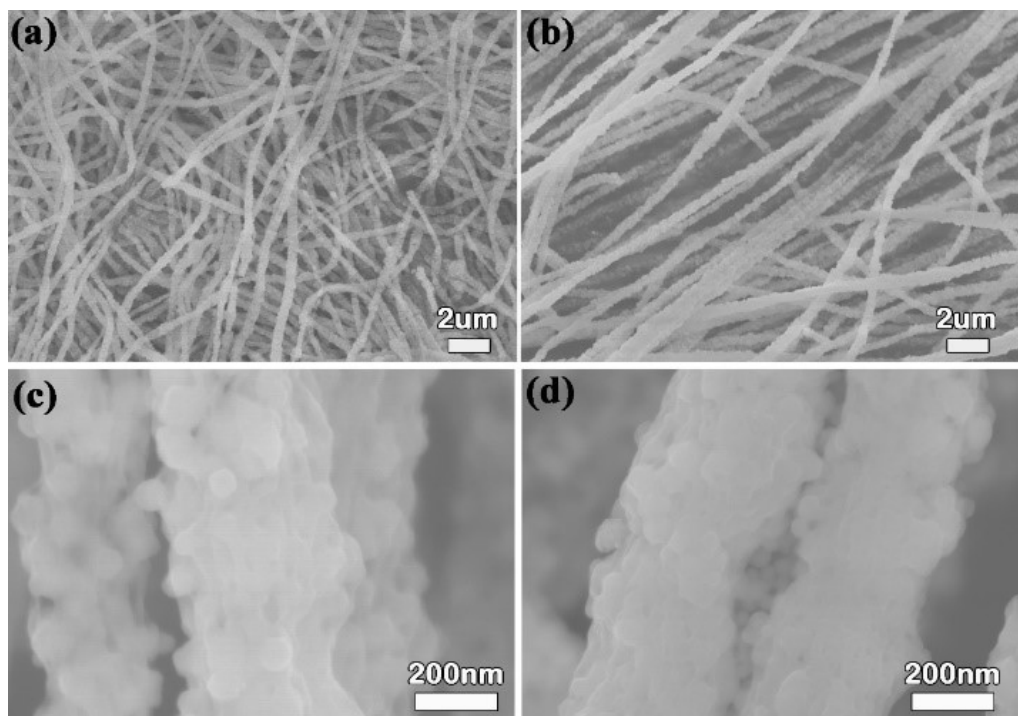

Fig. S2. SEM images of ZIF8@ZIF67@PAN fibers.

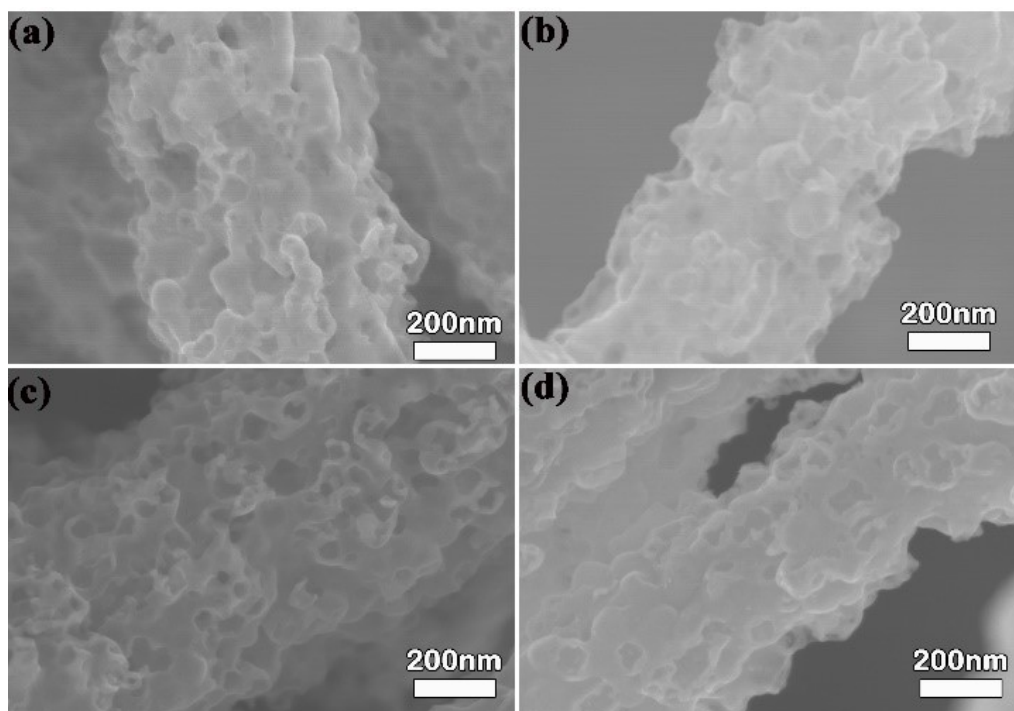

**Fig. S3.** SEM images of CPCFs.

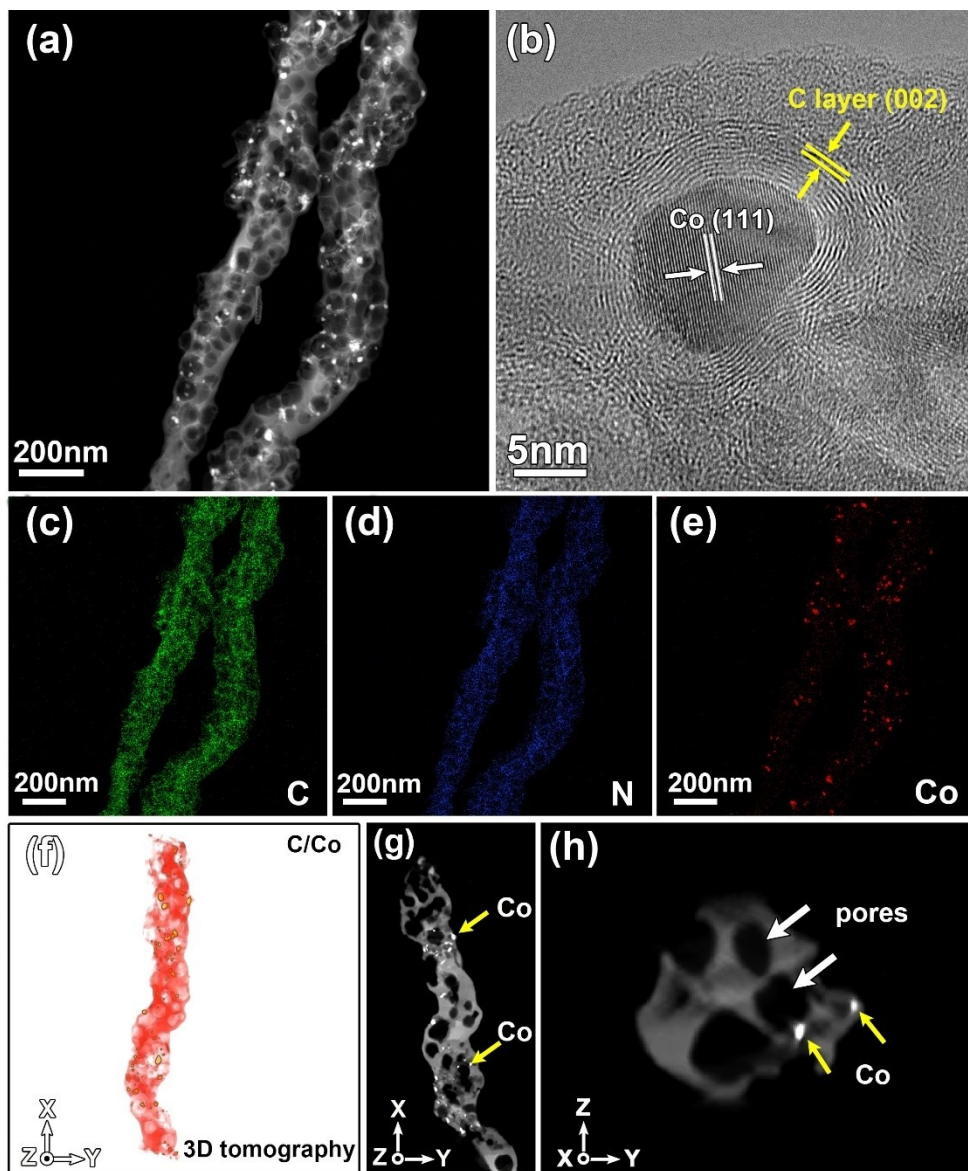

**Fig. S4.** CPCFs: (a) HAADF-STEM image, (b) HR-TEM image, (c-e) EDS elemental maps: C (green), N (blue) and Co (red), (f) 3D electron tomographic reconstruction, (g and h) the orthoslices along two directions, pores indicated by the white arrows and Co nanoparticles indicated by the yellow arrows.

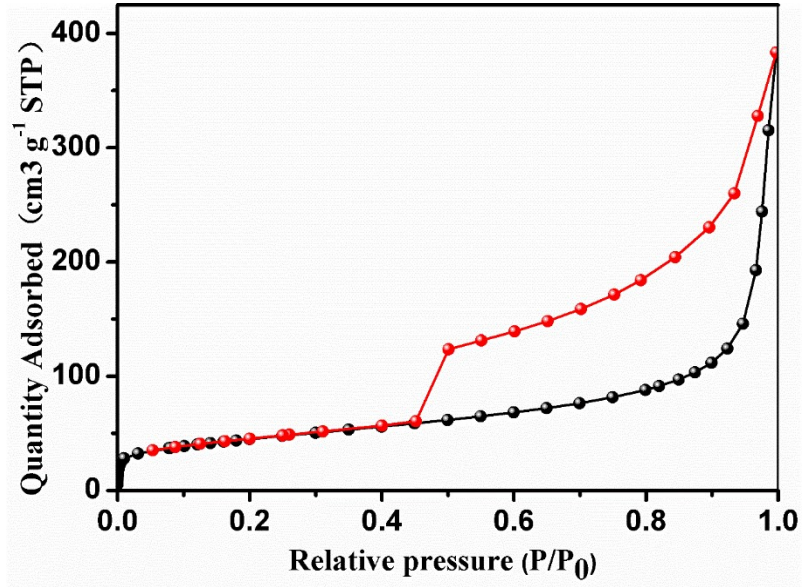

**Fig. S5.** Nitrogen adsorption/desorption isotherms of CPCFs.

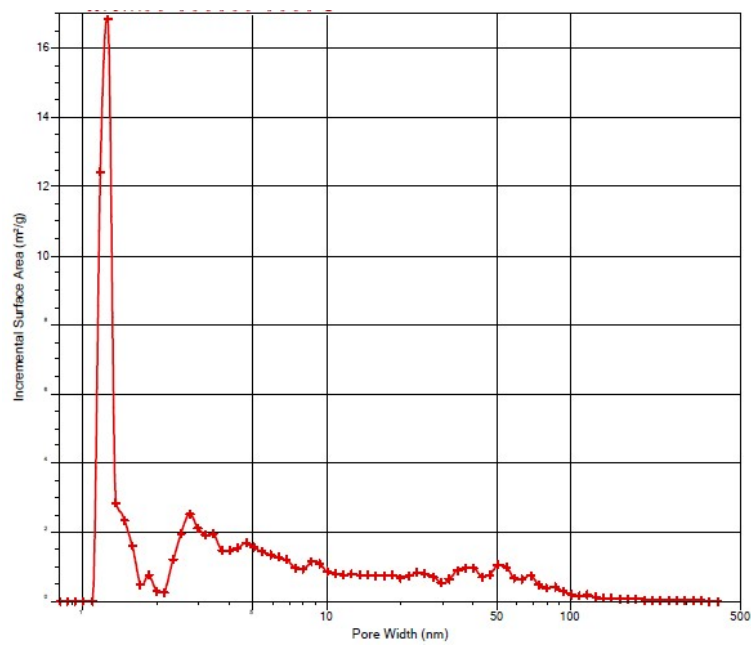

**Fig. S6.** Pore-size distribution plots of CPCFs.

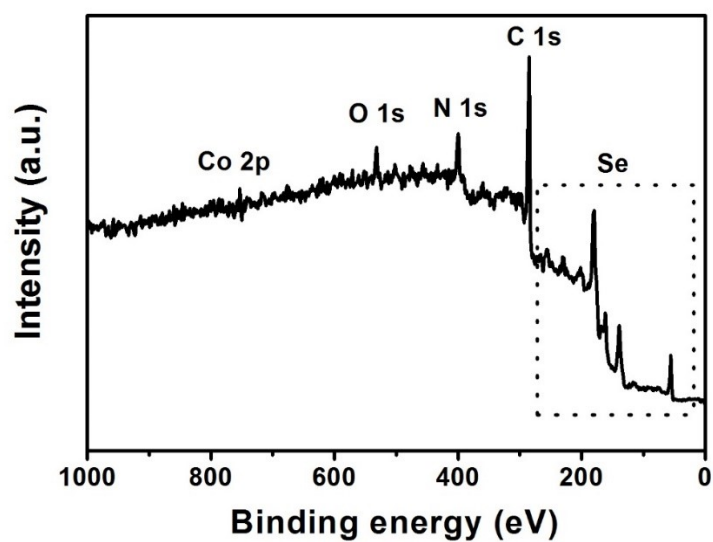

Fig. S7. XPS spectra of the Se@CPCFs.

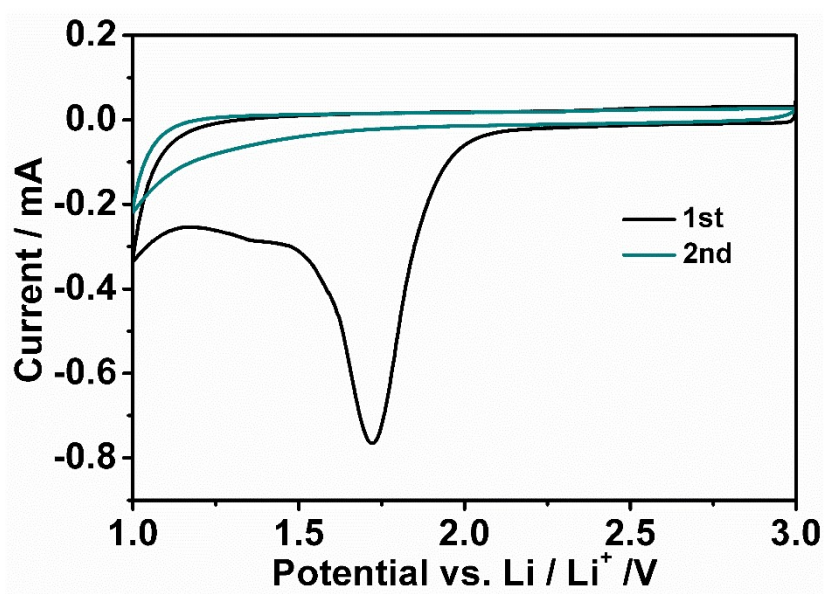

Fig. S8. CV curve of CPCFs cathode.

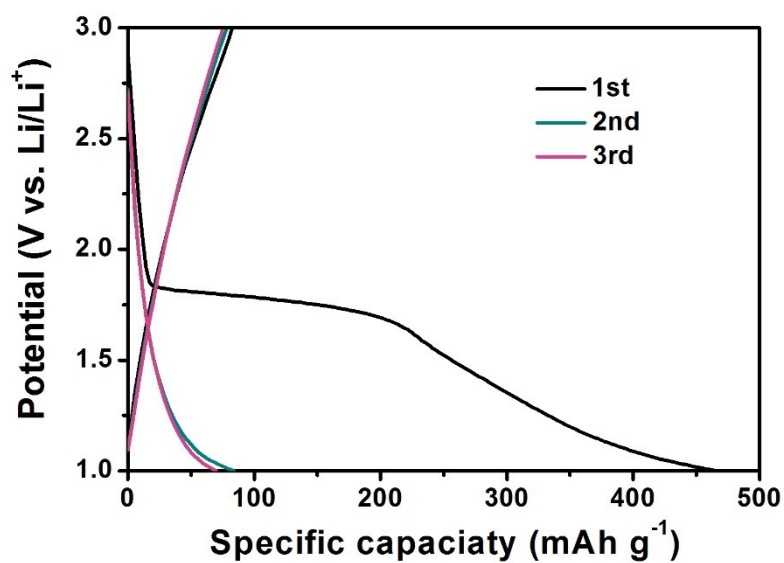

Fig. S9. Discharge and charge profile of CPCFs electrode.

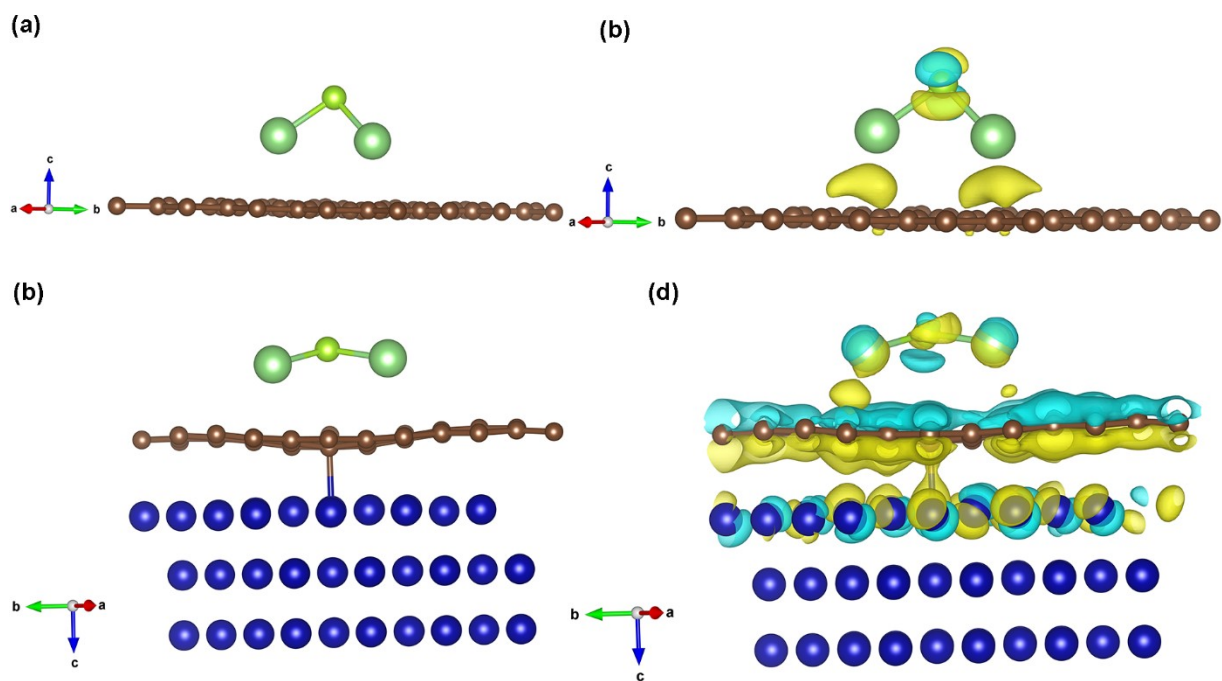

Fig. S10. (a) DFT calculations of absorption structure of Gr with  $\text{Li}_2\text{Se}$ ; (b) Charge density difference plot for  $\text{Li}_2\text{Se}$  interacting with Gr; (c) absorption structure of Co-Gr with  $\text{Li}_2\text{Se}$ ; (d) Charge density difference plot for  $\text{Li}_2\text{Se}$  interacting with Co-Gr. The yellow (blue) distribution corresponds to charge accumulation (depletion).

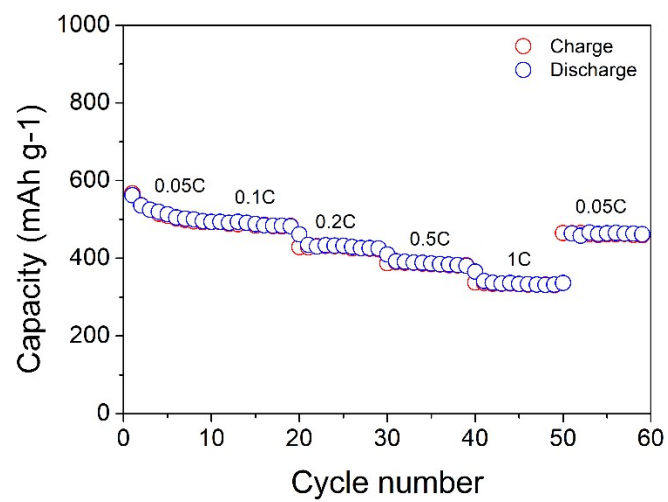

**Fig. S11.** The rate performance of the pouch cell with Se@CPCFs cathode.
